# Supplementary material
Source: PubMed Central journal article supplement (PMC3573238)
Supplement: NIHMS418057-supplement-Supplementary_information.pdf [file NIHMS418057-supplement-Supplementary_information.pdf]

| Structure                                                                           | ABHD6 IC <sub>50</sub><br>μM | Name   | Reference |
|-------------------------------------------------------------------------------------|------------------------------|--------|-----------|
| 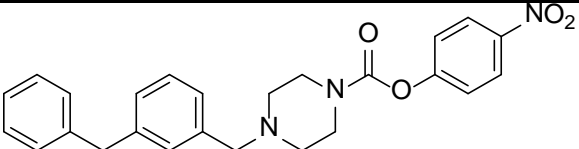   | 0.05                         | JZL195 | (1)       |
|    | 0.06                         | 36n    | (2)       |
|    | 0.070                        | WWL70  | (3)       |
|    | 0.130                        | 36k    | (2)       |
|   | 0.150                        | 36a    | (2)       |
|  | 0.18                         | 33e    | (2)       |
|  | 0.180                        | 36l    | (2)       |
|  | 0.22                         | 36h    | (2)       |
|  | 0.22                         | 36j    | (2)       |

|                                                                                     |       |        |     |
|-------------------------------------------------------------------------------------|-------|--------|-----|
| 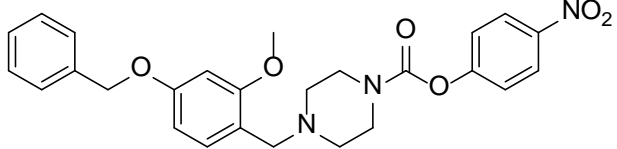   | 0.31  | 36g    | (2) |
|    | 0.32  | 36p    | (2) |
|    | 0.35  | 18     | (3) |
|    | 0.38  | 20     | (2) |
|   | 0.43  | WWL123 | (4) |
|  | 0.46  | 33a    | (2) |
|  | 0.46  | 36o    | (2) |
|  | 0.490 | 36b    | (2) |
|  | 0.55  | 23     | (2) |

|                                                                                     |       |             |     |
|-------------------------------------------------------------------------------------|-------|-------------|-----|
| 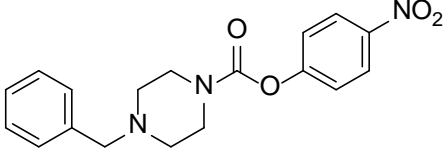   | 0.740 | 36c         | (2) |
|    | 0.90  | WWL152<br>5 | (2) |
|    | 1.0   | 16          | (3) |
|    | 1.00  | 36i         | (2) |
|   | 1.02  | 33d         | (2) |
|  | 1.1   | 17          | (2) |
|  | 1.10  | 33b         | (2) |
|  | 1.13  | 36m         | (2) |
|  | 1.27  | 36d         | (2) |

|                                                                                     |      |             |     |
|-------------------------------------------------------------------------------------|------|-------------|-----|
| 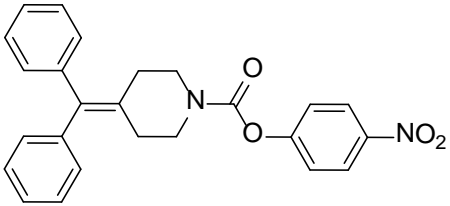   | 1.3  | 19          | (2) |
|    | 1.65 | 36e         | (2) |
|    | 2.11 | JZL175<br>6 | (2) |
|    | 2.12 | 29          | (2) |
|   | 2.3  | 5           | (3) |
|  | 2.86 | 36f         | (2) |
|  | 3.27 | JZL184      | (2) |
|  | 3.43 | 33f         | (2) |

|                                                                                     |      |     |     |
|-------------------------------------------------------------------------------------|------|-----|-----|
| 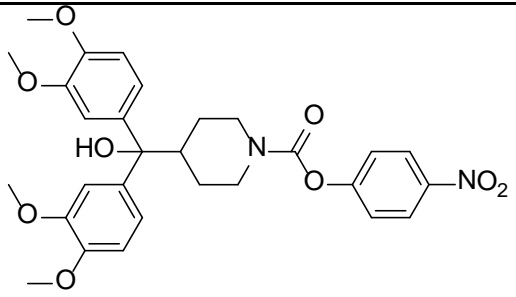    | 6.96 | 33c | (2) |
|    | > 50 | 9a  | (2) |
|    | >50  | 9b  | (2) |
|   | >50  | 15  | (2) |
|  | >100 | 36q | (2) |

1. Long, J. Z., Nomura, D. K., Vann, R. E., Walentiny, D. M., Booker, L., Jin, X., Burston, J. J., Sim-Selley, L. J., Lichtman, A. H., Wiley, J. L., and Cravatt, B. F. (2009) Dual blockade of FAAH and MAGL identifies behavioral processes regulated by endocannabinoid crosstalk in vivo, *Proc. Natl. Acad. Sci. U. S. A.* *106*, 20270-20275.
2. Long, J. Z., Jin, X., Adibekian, A., Li, W. W., and Cravatt, B. F. (2010) Characterization of Tunable Piperidine and Piperazine Carbamates as Inhibitors of Endocannabinoid Hydrolases, *J. Med. Chem.* *53*, 1830-1842.
3. Li, W. W., Blankman, J. L., and Cravatt, B. F. (2007) A functional proteomic strategy to discover inhibitors for uncharacterized hydrolases, *J. Am. Chem. Soc.* *129*, 9594-9595.
4. Bachovchin, D. A., Ji, T. Y., Li, W. W., Simon, G. M., Blankman, J. L., Adibekian, A., Hoover, H., Niessen, S., and Cravatt, B. F. (2010) Superfamily-wide portrait of serine hydrolase inhibition achieved by library-versus-library screening, *Proc. Natl. Acad. Sci. U. S. A.* *107*, 20941-20946.
